# Supplementary material for: Evolution of genetic assessment for BRCA-associated gynaecologic malignancies: a Canadian multisociety roadmap
Source: PubMed Central journal article supplement — J Med Genet. 2018 Jul 24;55(9):571–7. doi: 10.1136/jmedgenet-2018-105472 (PMC6119348; doi:10.1136/jmedgenet-2018-105472), 2018-07-24
Supplement: jmedgenet-2018-105472supp001.pdf [file jmedgenet-2018-105472supp001.pdf]

**Supplement 1: Formal and Informal Genetic Testing Criteria for Hereditary Breast and Ovarian Cancer Syndrome in Canada**

| <b>Province*</b> | <b>Isolated ovarian cancer**</b>                                                                                                                   | <b>Other Criteria***</b>                                                                                                                                                                                                                                                                                                                                                                                                                                                                                                                                     |
|------------------|----------------------------------------------------------------------------------------------------------------------------------------------------|--------------------------------------------------------------------------------------------------------------------------------------------------------------------------------------------------------------------------------------------------------------------------------------------------------------------------------------------------------------------------------------------------------------------------------------------------------------------------------------------------------------------------------------------------------------|
| British Columbia | <ol style="list-style-type: none"> <li>1. Invasive Non-mucinous epithelial OV</li> <li>2. STIC (serous tubal intraepithelial carcinoma)</li> </ol> | <ol style="list-style-type: none"> <li>1. BC <math>\leq 35y</math></li> <li>2. BC <math>\leq 50y</math> and no knowledge of family history due to adoption</li> <li>3. TNBC <math>\leq 60y</math></li> <li>4. Bilateral BC, youngest <math>\leq 50y</math></li> <li>5. BC AND OV</li> <li>6. OV AND relative with OV OR BC</li> <li>7. Male BC AND relative with BC OR OV</li> <li>8. BC <math>\leq 50y</math> AND relative with BC <math>\leq 50y</math></li> <li>9. BC AND <math>\geq 2</math> relatives with BC (one <math>\leq 50y</math>)</li> </ol>    |
| Alberta          | <ol style="list-style-type: none"> <li>1. Invasive non-mucinous epithelial OV</li> </ol>                                                           | <ol style="list-style-type: none"> <li>1. BC <math>\leq 35y</math></li> <li>2. TNBC <math>\leq 60y</math></li> <li>3. Male BC, <math>\leq 65y</math></li> <li>4. Bilateral BC, youngest <math>\leq 50y</math></li> <li>5. BC AND OV</li> <li>6. OV AND relative with OV OR BC</li> <li>7. Male BC AND relative with BC OR OV</li> <li>8. BC <math>\leq 50y</math> AND relative with BC <math>\leq 50y</math></li> <li>9. BC AND relative with OV OR Male BC</li> <li>10. BC AND <math>\geq 2</math> relatives with BC (one <math>\leq 50y</math>)</li> </ol> |
| Saskatchewan     | <ol style="list-style-type: none"> <li>1. High-grade serous OV</li> <li>2. Non-mucinous epithelial OV 30-60y</li> </ol>                            | <ol style="list-style-type: none"> <li>1. BC <math>\leq 35y</math></li> <li>2. TNBC <math>\leq 60y</math></li> <li>3. Male BC</li> <li>4. Bilateral BC, youngest <math>\leq 50y</math></li> <li>5. BC AND OV</li> <li>6. OV AND F/SDR with OV any age</li> <li>7. BC <math>\leq 60y</math> AND F/SDR with OV OR Male BC</li> <li>8. BC <math>\leq 50y</math> AND F/SDR with BC <math>\leq 50y</math></li> <li>9. <math>\geq 3</math> cases of BC/OV in a pattern suggestive of hereditary cancer</li> </ol>                                                  |
| Manitoba         | <ol style="list-style-type: none"> <li>1. Invasive high-grade serous OV</li> <li>2. Non-mucinous epithelial OV <math>\leq 60y</math></li> </ol>    | <ol style="list-style-type: none"> <li>1. BC <math>\leq 35y</math></li> <li>2. TNBC <math>\leq 50y</math></li> <li>3. Male BC</li> <li>4. BC AND OV</li> <li>5. Bilateral BC, youngest <math>\leq 50y</math></li> <li>6. OV AND F/SDR with OV OR BC <math>\leq 50y</math> OR Male BC</li> <li>7. BC <math>\leq 50y</math> AND F/SDR with BC <math>\leq 50y</math> OR OV OR Male BC</li> </ol>                                                                                                                                                                |

|                                                         |                                                               |                                                                                                                                                                                                                                                                                                                                                 |
|---------------------------------------------------------|---------------------------------------------------------------|-------------------------------------------------------------------------------------------------------------------------------------------------------------------------------------------------------------------------------------------------------------------------------------------------------------------------------------------------|
|                                                         |                                                               | 8. BC $\leq$ 50y AND $\geq$ 2 F/SDR with BC (at least one $\leq$ 50y) OR $\geq$ 3 FDR with BC<br>9. BC $\leq$ 60y AND $\geq$ 3 F/SDR with either BC $<$ 50y or OV                                                                                                                                                                               |
| Ontario                                                 | 1. Invasive serous OV                                         | 1. BC $<$ 35y<br>2. Male BC<br>3. BC AND OV<br>4. Bilateral BC, youngest $<$ 50y<br>5. OV AND F/SDR with OV<br>6. BC $<$ 50y AND F/SDR with BC $<$ 50y<br>7. BC $<$ 60y AND F/SDR with OV OR Male BC<br>8. $\geq$ 3 cases of BC/OV in a pattern suggestive of hereditary cancer<br>9. $>$ 10% risk of hereditary breast/ovarian cancer syndrome |
| Quebec                                                  | Institution Specific, typically includes High-grade serous OV | Institution Specific                                                                                                                                                                                                                                                                                                                            |
| New Brunswick<br>Prince Edward<br>Island<br>Nova Scotia | 1. Epithelial OV                                              | 1. BC $<$ 40y<br>2. TNBC $<$ 50y<br>3. Male BC<br>4. BC AND OV<br>5. Bilateral BC, youngest $<$ 50y<br>6. BC $<$ 50y AND F/S/TDR with BC $<$ 50y OR OV<br>7. $>$ 10% risk of hereditary breast/ovarian cancer syndrome ( <i>affected only</i> )                                                                                                 |
| Newfoundland                                            | 1. Invasive non-mucinous epithelial OV                        | 1. BC $<$ 35y<br>2. TNBC $<$ 50y<br>3. Male BC<br>4. Bilateral BC, youngest $<$ 50y<br>5. TNBC $>$ 50y AND F/SDR with BC<br>6. 3 F/SDR with BR/OV AND $\geq$ 1 diagnosed $<$ 50y OR BR and OV in the same person, OR bilateral/multifocal BR<br>7. $\geq$ 4 F/SDR with BR/OV in a pattern suggestive of a hereditary cancer predisposition.     |

OV: Ovarian Cancer, BC: Breast cancer, TNBC: Triple Negative Breast Cancer, FDR: First-degree relative, SDR: Second-degree relative, TDR: Third-degree relative.

Where applicable, family history is assumed to be on the same side of the family. Unless otherwise stated, cancer diagnosis may be at any age.

\*Canadian territories (Yukon, Northwest Territories, and Nunavut) are serviced by various provincial centres

\*\* Ovarian cancer includes ovarian, fallopian tube cancer, and primary peritoneal cancer

\*\*\* Only criteria for individuals affected with breast or ovarian cancer are listed
